# Supplementary material
Source: PubMed Central journal article supplement (PMC8297496)
Supplement: Table_S1_8_3_232.pdf [file Table_S1_8_3_232.pdf]

**Table S1.** Categories/Themes From Free-Text Descriptions of Experiences During OFF Periods (N=2110)

| General category or theme | Specific category or theme                      | Description of category or theme                                                                                                                                                                                                                                                                                                           | Verbatim sample text for each (limit to 2–3)                                                                                                                                                                                                        | n (%)       |
|---------------------------|-------------------------------------------------|--------------------------------------------------------------------------------------------------------------------------------------------------------------------------------------------------------------------------------------------------------------------------------------------------------------------------------------------|-----------------------------------------------------------------------------------------------------------------------------------------------------------------------------------------------------------------------------------------------------|-------------|
| Motor symptom             | tremors / tremulousness                         | Internal and external tremors and shakes                                                                                                                                                                                                                                                                                                   | constant tremor in lower legs<br>I get internal tremors that I do not experience during on times.                                                                                                                                                   | 1038 (49.2) |
|                           | gait and freezing                               | mention of gait, freezing, shuffling, walking, dragging leg, falling, trepidation about falling, legs wobbly, initiation of walking, gait is sluggish                                                                                                                                                                                      | During off periods I have significant trouble ambulating.<br>I shuffle my feet and my posture is not good.<br>unable to step forward when standing frozen in place                                                                                  | 535 (25.4)  |
|                           | stiffness / rigidity                            | mention of stiffness, rigidity, tightness, physical tension in body                                                                                                                                                                                                                                                                        | I start to stiffen up – especially neck and back.<br>My hands are more rigid and my muscles stiffen.                                                                                                                                                | 430 (20.4)  |
|                           | slowness                                        | slow movement, mention of slowness (but not slow cognition), sluggish movements                                                                                                                                                                                                                                                            | feels like I'm moving in slow motion<br>I feel draggy and slower to perform tasks.                                                                                                                                                                  | 358 (17.0)  |
|                           | balance                                         | balance issues, imbalance, unsteady, lose balance                                                                                                                                                                                                                                                                                          | My balance is compromised and I feel precarious.<br>My balance is very unsteady, exhibited as some hesitation when walking a straight line.                                                                                                         | 320 (15.2)  |
|                           | coordination / motor control                    | related to lack of control of movements, not moving well (nonspecifically stated), controlled movement, clumsy, movements not as smooth, fluid (in relation to movements)                                                                                                                                                                  | Fine motor skills are slower, more awkward, less controlled.<br>I cannot control my left arm and my right toes, it feels awkward almost painful.                                                                                                    | 258 (12.2)  |
|                           | dystonia                                        | toe curling, use of word dystonia, pulling, curling, foot twisting?                                                                                                                                                                                                                                                                        | get major dystonia [sic] in one leg – leg contractions every 6 seconds or so and foot cramp<br>Toes on my right foot curl when I am tired or at the end of my medication dose.                                                                      | 106 (5.0)   |
|                           | dyskinesia                                      | Head bobbing?                                                                                                                                                                                                                                                                                                                              | trouble with gait and more dyskinesia [sic] and head bobbing<br>I have a lot of twisting (dyskinesia [sic]) of my legs especially the right side.                                                                                                   | 58 (2.7)    |
|                           | posture                                         | Hunching, postural stability, can't straighten up                                                                                                                                                                                                                                                                                          | may shuffle and tend to lean forward and have to concentrate more to maintain my posture<br>posture is more slumped, feels like there is no core strength                                                                                           | 48 (2.3)    |
| Nonmotor symptoms         | fatigue                                         | energy drops, low energy, tired, drained, tiredness, I feel sluggish, I get sluggish                                                                                                                                                                                                                                                       | I feel like I am weighted down, tired, and I get fatigued quickly.<br>tiredness that leaves me feeling on the verge of exhaustion, this usually occurs after strenuous activities                                                                   | 397 (18.8)  |
|                           | mood / anxiety                                  | anxiety, blues, unmotivated, depression, quiet/withdrawn, nervous agitation, moody or mood swings, heightened emotions                                                                                                                                                                                                                     | The anxiety is very uncomfortable.<br>I get more emotional, cry more easily.                                                                                                                                                                        | 318 (15.1)  |
|                           | cognitive symptoms                              | trouble focusing, attention, concentration, brain fog, not sharp, feel dumb, memory, slow thinking, brain feels sluggish                                                                                                                                                                                                                   | inability to focus<br>slow cognitive processing<br>I have trouble processing information.                                                                                                                                                           | 327 (15.5)  |
|                           | pain / ache / cramping                          | cramping, headache, muscle spasm                                                                                                                                                                                                                                                                                                           | I get cramps in my left leg and foot after a while.<br>The muscles in my back spasm sometimes for an hour or more. I also have pain in my lower right back and have trouble walking while off.                                                      | 303 (14.4)  |
|                           | mouth, speech, face symptoms                    | speech related, low voice, soft voice, drooling, mention of saliva, speech slurred, hoarse voice, facial movements, difficulty swallowing                                                                                                                                                                                                  | facial masking, changes in speech volume<br>frozen face with drooling                                                                                                                                                                               | 221 (10.5)  |
|                           | sensory symptom (excluding pain)                | burning sensation, RLS, restlessness, hands go numb, fidgety, jittery, twitching, tingling, feel cold, heaviness, paresthesia, jerking                                                                                                                                                                                                     | can't feel the bottom of my feet, I'm cold and shivering<br>minor loss of feeling in tips of fingers on right hand, sensation of reduced feeling in soles of feet<br>a heavy or weighted feeling in arms and legs                                   | 140 (6.6)   |
|                           | dizziness                                       | dizzy, dizziness, light-headed                                                                                                                                                                                                                                                                                                             | dizzy and unstable when walking<br>start to feel dizzy/lightheaded (not vertigo)                                                                                                                                                                    | 50 (2.4)    |
|                           | other symptoms                                  | pounding in ears, teeth clenching, nausea, sleeplessness, insomnia, incontinence, hot flashes, appetite, difficulty breathing, malaise/general discomfort, swaying, bladder issues, uneasy feeling, noise sensitivity, psychosis, night terrors, floating, claustrophobia, swelling, nonspecific Parkinson's symptoms, tachycardia, vision | constant swaying of upper body<br>I also have a systemic feeling of slight illness.<br>some nausea and upper forehead sweating                                                                                                                      | 203 (9.6)   |
| Phenomenon of fluctuation | time / timing                                   | mentioning time, including how long meds last, time of day, diurnal variations, schedule, randomly, time of triggering events, timing of meds                                                                                                                                                                                              | Wake up ON, take morning meds ON, then comes an OFF period for 15 minutes to half-hour.<br>I have one or two a day, usually in late afternoon.<br>I am learning that previously small amounts of stress now can dramatically affect my OFF periods. | 356 (16.9)  |
| Functional consequences   | functional consequences (not including walking) | trouble with ADL such as difficulty dressing, reading, difficulty typing, handwriting changes, difficulty screwing small screw, writing, applying makeup, brushing teeth, using silverware, small penmanship, standing from chair                                                                                                          | As for typing or using a fork to eat, it is slow and frustrating. Forget about using a knife!<br>difficulty with shaving and brushing my teeth                                                                                                      | 184 (8.7)   |
| Not classifiable          |                                                 | nonspecific response such as "physical" or "emotional" without further description                                                                                                                                                                                                                                                         |                                                                                                                                                                                                                                                     | 23 (1.1)    |

ADL, activities of daily living; RLS, restless legs syndrome.
